# Supplementary material for: Using 3 TLR ligands as a combination adjuvant induces qualitative changes in T cell responses needed for antiviral protection in mice
Source: JCI journal article supplement (doi:10.1172/jci39293), 2010-01-25
Supplement: sd1 [file 1]

**Fig S1**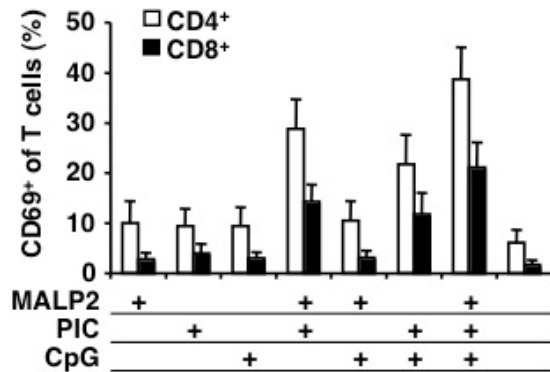

**Figure S1** The triple TLR ligands do not further enhance T cell responses by increasing T cell numbers. BM-DCs were pretreated with TLR ligands for 20 h. Excessive TLR ligands were washed off and DCs were cocultured with splenic Pan T cells freshly isolated from syngeneic mice for 24 h. T cell subsets stimulated to express CD69 were analyzed by flow. Results represent one of two independent experiments.

Fig S2

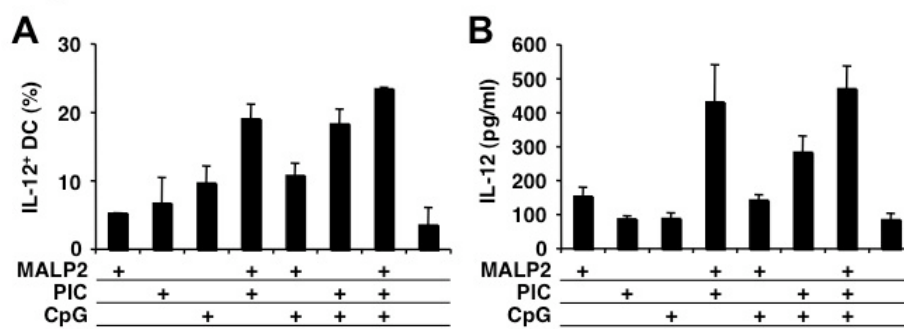

**Figure S2** The triple TLR ligands do not further enhance IL-12 production. After 20 h of treatment with TLR ligands, BM-DCs were stained with intracellular IL-12 (A), and the supernatants were measured for secreted IL-12p70 (B).

Fig S3

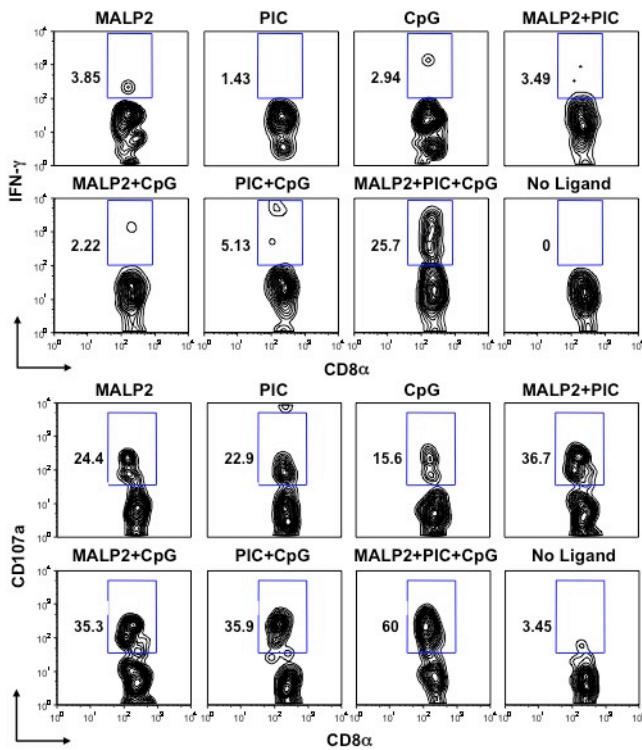

**Figure S3** The triple TLR ligand combination induces higher functional CD8<sup>+</sup> T cells. Mice were immunized s.c. in the back flank with BM-DCs pretreated with TLR ligands and pulsed with P18-I10. Spleen cells were recovered at one month and re-stimulated with P18-I10 at  $10^{-2}$   $\mu$ M. IFN- $\gamma$  were measured 5 h after re-stimulation. The values represent the % of tetramer<sup>+</sup>CD8<sup>+</sup> T cells. The results are representative of two independent experiments.

Fig S4

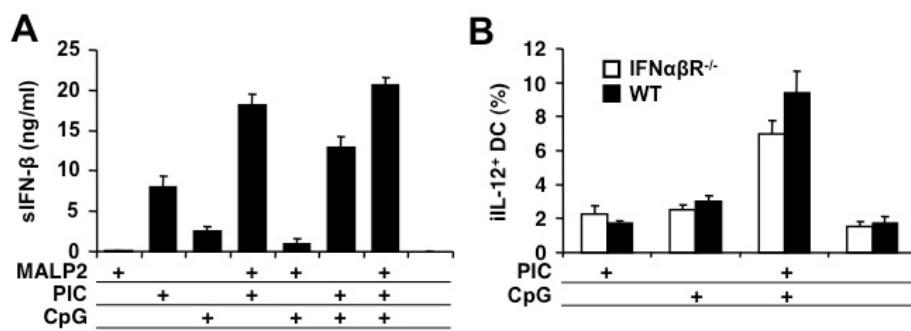

**Figure S4** Double TLR ligands selectively amplify IFN- $\beta$  and the cytokine is not required to augment IL-12. After 20 h of treatment of BM-DCs with TLR ligands, supernatants were measured for secreted IFN- $\beta$  (**A**) or the cells (from either WT or IFN $\alpha\beta$ R<sup>-/-</sup>) were stained with intracellular IL-12 (**B**).
